# Supplementary material for: EFEMP1 induces γ-secretase/Notch-mediated temozolomide resistance in glioblastoma
Source: PubMed Central journal article supplement (PMC3964213; doi:10.18632/oncotarget.1620), 2013-12-07
Supplement: oncotarget-05-363-s001.pdf [file oncotarget-05-363-s001.pdf]

**EFEMP1 induces  $\gamma$ -secretase/Notch-mediated temozolomide resistance in glioblastoma – Hiddingh et al**

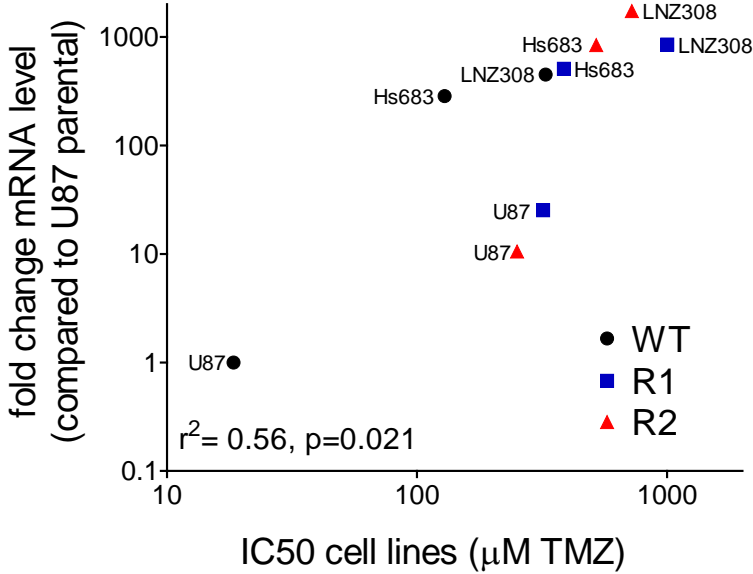

**Supplementary Figure S1:** Correlation of TMZ IC<sub>50</sub> values and EFEMP1 mRNA expression levels. IC<sub>50</sub> values of the WT, R1, and R2 glioblastoma cell lines were compared to the corresponding EFEMP1 expression levels ( $r^2=0.56$   $p=0.021$ ).
