# Supplementary material for: EFEMP1 induces γ-secretase/Notch-mediated temozolomide resistance in glioblastoma
Source: PubMed Central journal article supplement (PMC3964213; doi:10.18632/oncotarget.1620), 2013-12-07
Supplement: oncotarget-05-363-s002.pdf [file oncotarget-05-363-s002.pdf]

## EFEMP1 induces $\gamma$ -secretase/Notch-mediated temozolomide resistance in glioblastoma – Hiddingh et al

**Supplementary Table S1:** Characteristics of the parental and TMZ-resistant (R1 and R2) glioblastoma cell lines. IC<sub>50</sub> values, MGMT methylation index, microsatellite instability and MSH6 mutation status of the individual cell lines are shown. MGMT methylation index was determined by MLPA (multiplex ligation-dependent probe amplification).

| Cell line |          | IC <sub>50</sub> ( $\mu$ M TMZ) | MGMT methylation index | Microsatellite instability | MSH6 mutation |
|-----------|----------|---------------------------------|------------------------|----------------------------|---------------|
| Hs683     | Parental | 128.9                           | 0.5                    | No                         | No            |
|           | R1       | 386.4                           | 0.3                    | No                         | No            |
|           | R2       | 520.5                           | 0.3                    | No                         | No            |
| U87       | Parental | 18.45                           | 0.8                    | No                         | No            |
|           | R1       | 319.5                           | 1.0                    | No                         | No            |
|           | R2       | 251.3                           | 0.8                    | No                         | No            |
| LNZ308    | Parental | 326.7                           | 0.8                    | No                         | No            |
|           | R1       | 1001.0                          | 0.7                    | No                         | No            |
|           | R2       | 723.5                           | 0.8                    | No                         | No            |
